# Supplementary material
Source: PubMed Central journal article supplement (PMC4599349)
Supplement: NIHMS723335-supplement-Supplemental.pdf [file NIHMS723335-supplement-Supplemental.pdf]

Supplementary Figure 1

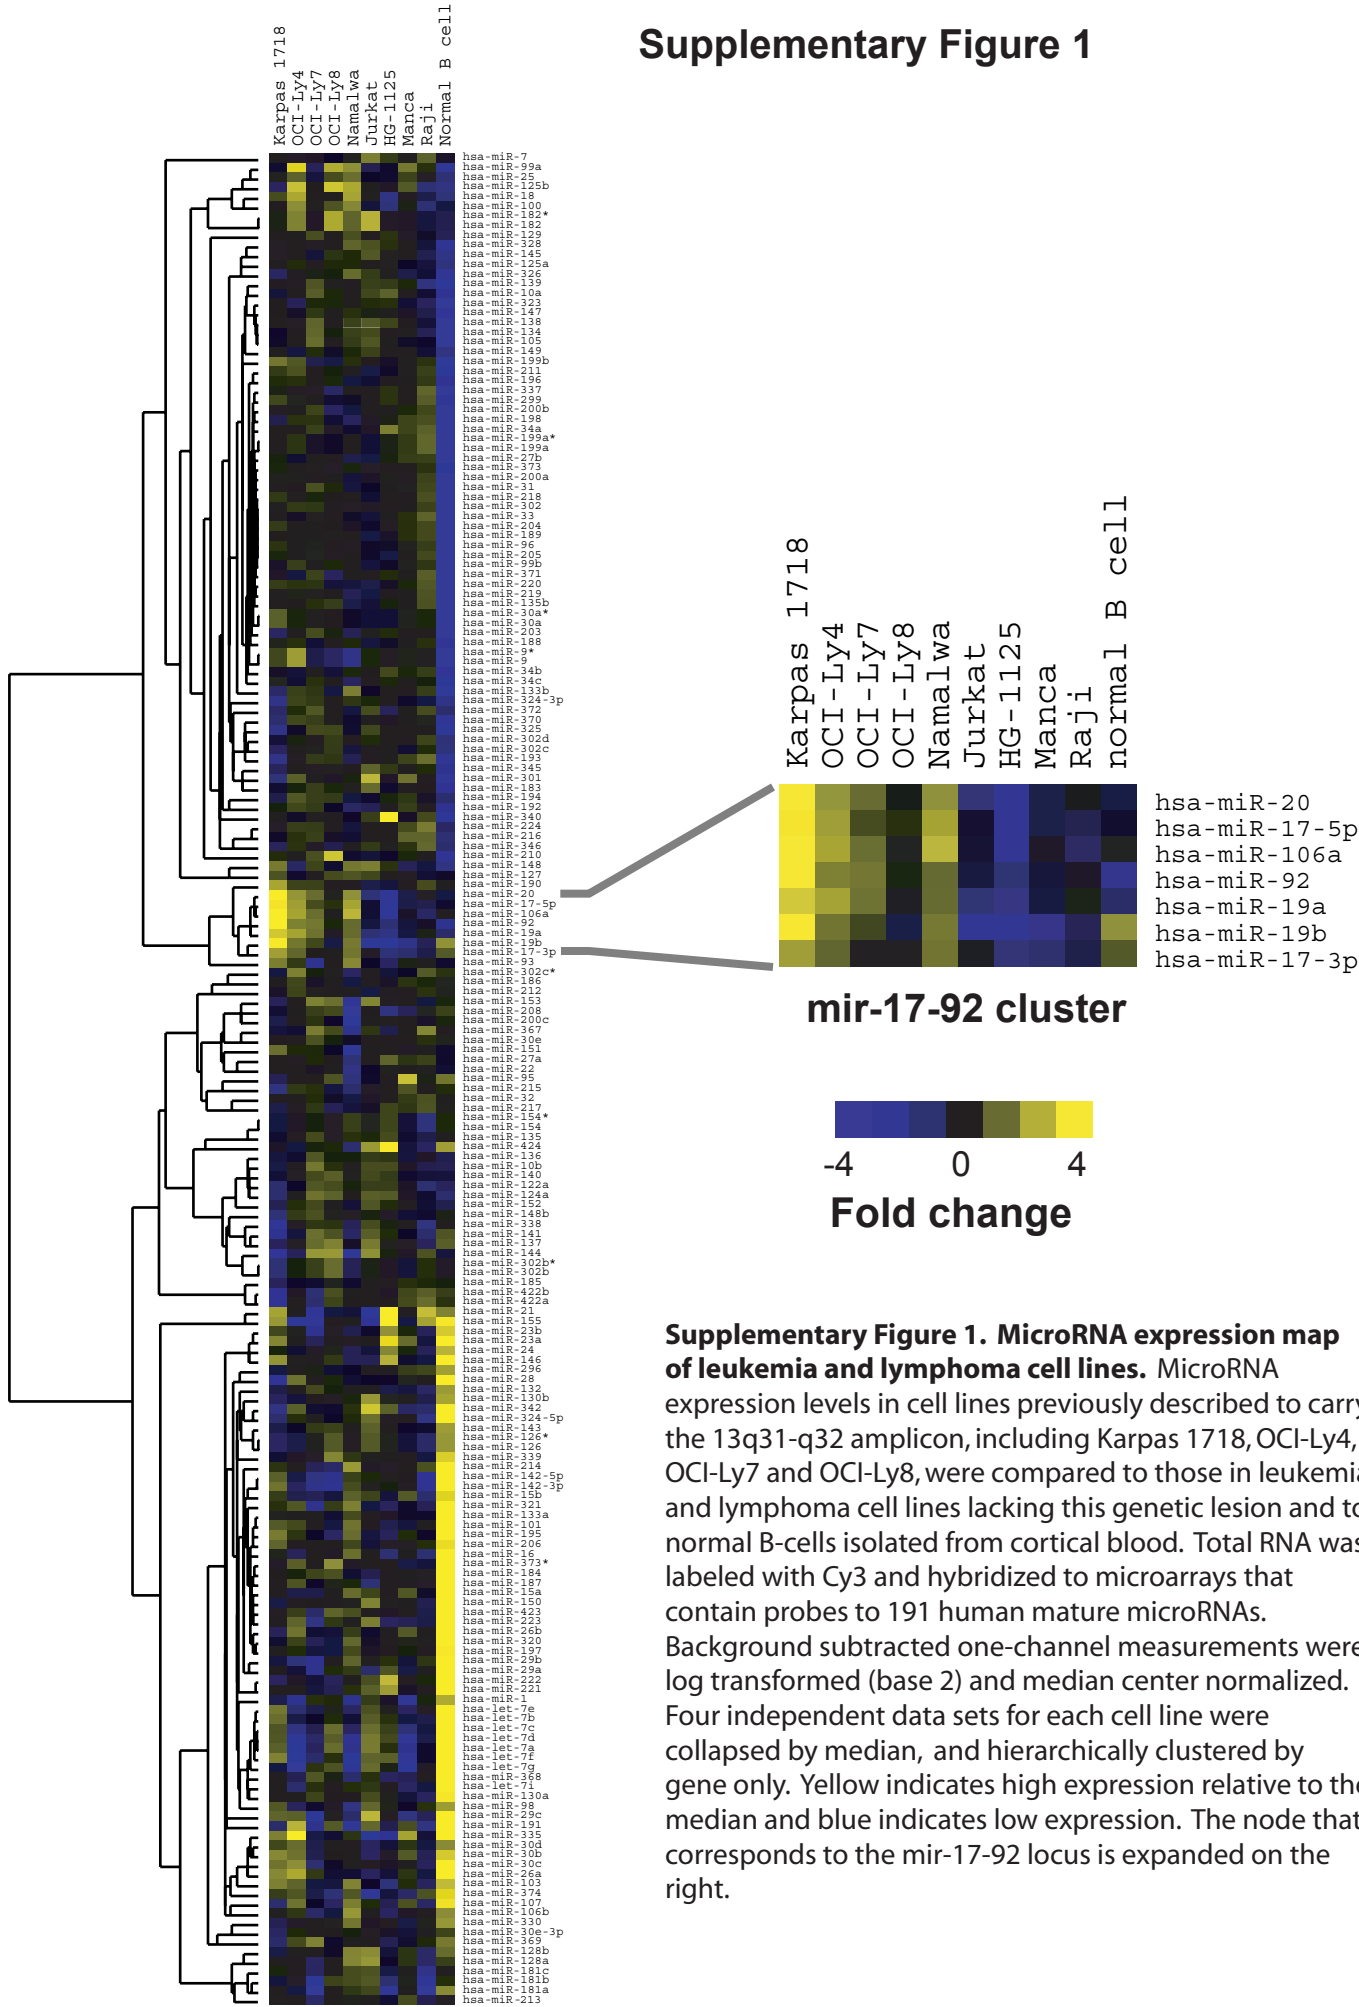

Supplementary Figure 2.

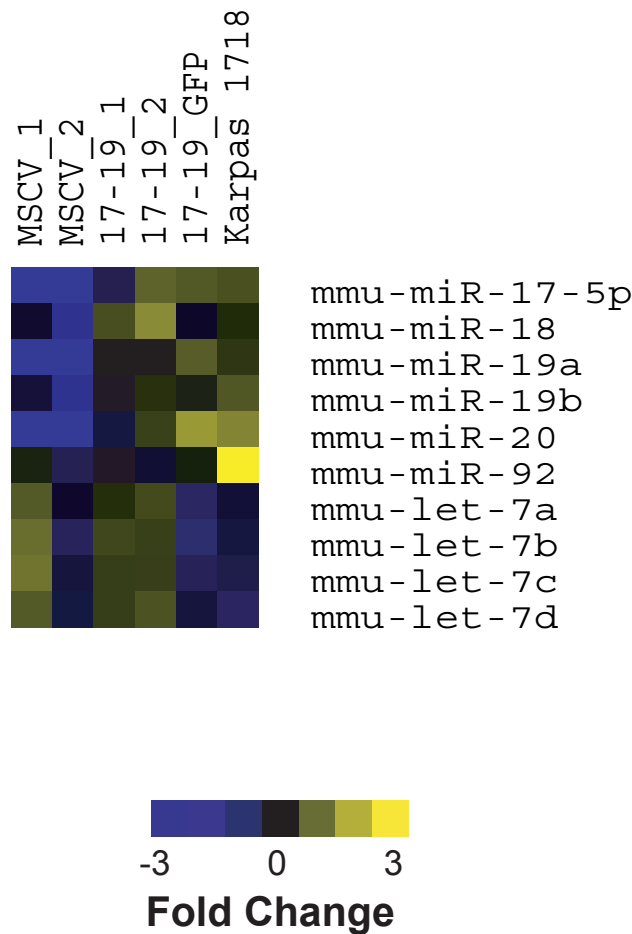

**Supplementary Figure 2. Ectopic expression of mir17-92 in *Eμ-myc/mir17-19b* B-cell lymphomas.** MicroRNA expression from two control *Eμ-myc/MSCV* lymphomas (MSCV\_1, MSCV\_2) and two *Eμ-myc/mir17-19b* lymphomas (17-19\_1, 17-19\_2) was quantitated by microarray analysis. Also measured was microRNA expression levels for *Eμ-myc/mir17-19b* lymphoma cells that were purified by FACS sorting for linked GFP expression (17-19\_GFP). Total RNA was labeled with Cy3 and hybridized to microarrays that contain probes to 198 mouse mature microRNAs. Background subtracted one-channel measurements were log transformed (base 2) and median center normalized. Four independent data sets for each cell line were collapsed by median, except for 17-19\_2 lymphoma, which had two data sets only. Karpas 1718, the cell line with the highest 13q31 amplification, is shown for comparison. The heat map indicates expression of each conserved (mouse/human) microRNA in the *mir17-92* locus, with four *let-7* microRNAs shown for comparison. Yellow indicates high expression relative to the median and blue indicates low expression.

Supplementary Table 1

Significant Genes List

|                                                  |                             |
|--------------------------------------------------|-----------------------------|
| Input Parameters                                 |                             |
| Imputation Engine                                | 10-Nearest Neighbor Imputer |
| Data Type                                        | Two Class, unpaired data    |
| Data in log scale?                               | TRUE                        |
| Number of Permutations                           | 100                         |
| Blocked Permutation?                             | FALSE                       |
| RNG Seed                                         | 1234567                     |
| (Delta, Fold Change)                             | (0.20243, 2.00000)          |
| (Upper Cutoff, Lower Cutoff)                     | (1.65693, -∞)               |
| Computed Quantities                              |                             |
| Computed Exchangeability Factor S0               | 0.085654726                 |
| S0 percentile                                    | 0                           |
| False Significant Number (Median, 90 percentile) | (1.00000, 4.20000)          |
| False Discovery Rate (Median, 90 percentile)     | (16.66667, 70.00000)        |
| Pi0Hat                                           | 1                           |

6 Positive Significant Genes

| Gene Name     | Score(d)    | Numerator(r) | Denominator(s+s0) | Fold Change | q-value (%) |
|---------------|-------------|--------------|-------------------|-------------|-------------|
| hsa-miR-92    | 2.181254144 | 1.124125     | 0.515357187       | 2.34459     | 16.66666667 |
| hsa-miR-19a   | 1.990500557 | 1.06695      | 0.53602095        | 2.12908     | 16.66666667 |
| hsa-miR-20    | 1.925478851 | 1.304075     | 0.677273084       | 2.54907     | 16.66666667 |
| hsa-miR-19b   | 1.887537933 | 1.33365      | 0.706555337       | 2.55144     | 16.66666667 |
| hsa-miR-17-5p | 1.729572125 | 1.126225     | 0.651158159       | 2.06056     | 16.66666667 |
| hsa-miR-106a  | 1.656932745 | 1.2342       | 0.744870306       | 2.29774     | 16.66666667 |

**Supplementary Table 1 Legend. Significance Analysis of Microarray (SAM) analysis of 13q31 amplicon cell lines.** The normalized, collapsed data set from Supplementary Figure 1 was used for SAM analysis using 2-fold minimum change restriction. Data was divided into two classes based on published presence of the amplicon as follows: Karpas 1618, OCI-Ly4, OCI-Ly7, OCI-Ly8 positive; Namalwa, HG1125, Jurkat, Manca, Raji, Negative. Six positive significant genes and zero negative significant genes were identified using a delta value of 0.202. The false discovery rate was 17%.

**Supplementary Table 2 : single miRNAs overexpressed in *Eμ-myc/+* HSCs**

| Pool # | miRNA subset <sup>a</sup> | # of receipient animals | # of animals developed lyphoma by 6 months | # of GFP positive tumors <sup>b</sup> |
|--------|---------------------------|-------------------------|--------------------------------------------|---------------------------------------|
| 1      | mmu-mir-206               | 3                       | 3                                          | 0                                     |
|        | mmu-mir-30a               |                         |                                            |                                       |
|        | mmu-mir-30c-2             |                         |                                            |                                       |
|        | mmu-mir-26b               |                         |                                            |                                       |
|        | mmu-mir-135b              |                         |                                            |                                       |
|        | mmu-mir-213               |                         |                                            |                                       |
|        | mmu-mir-199a-2            |                         |                                            |                                       |
|        | mmu-mir-350               |                         |                                            |                                       |
| 2      | mmu-mir-205               | 3                       | 1                                          | 0                                     |
|        | mmu-mir-129-2             |                         |                                            |                                       |
|        | mmu-mir-350               |                         |                                            |                                       |
|        | mmu-mir-126               |                         |                                            |                                       |
|        | mmu-mir-219-2             |                         |                                            |                                       |
|        | mmu-mir-130a              |                         |                                            |                                       |
|        | mmu-mir-129-2             |                         |                                            |                                       |
|        | mmu-mir-103-2             |                         |                                            |                                       |
| 3      | mmu-mir-296               | 3                       | 2                                          | 0                                     |
|        | mmu-mir-124a-2            |                         |                                            |                                       |
|        | mmu-mir-15b               |                         |                                            |                                       |
|        | mmu-mir-16-2              |                         |                                            |                                       |
|        | mmu-mir-302               |                         |                                            |                                       |
|        | mmu-mir-186               |                         |                                            |                                       |
|        | mmu-mir-32                |                         |                                            |                                       |
|        | mmu-mir-31                |                         |                                            |                                       |
| 4      | mmu-mir-101               | 3                       | 3                                          | 0                                     |
|        | mmu-mir-30c-1             |                         |                                            |                                       |
|        | mmu-mir-30e               |                         |                                            |                                       |
|        | mmu-mir-200a              |                         |                                            |                                       |
|        | mmu-mir-200b              |                         |                                            |                                       |
|        | mmu-mir-25                |                         |                                            |                                       |
|        | mmu-mir-93                |                         |                                            |                                       |
|        | mmu-mir-106b              |                         |                                            |                                       |
| 5      | mmu-mir-339               | 3                       | 1                                          | 0                                     |
|        | mmu-mir-129-1             |                         |                                            |                                       |
|        | mmu-mir-96                |                         |                                            |                                       |
|        | mmu-mir-183               |                         |                                            |                                       |
|        | mmu-mir-29a               |                         |                                            |                                       |
|        | mmu-mir-141               |                         |                                            |                                       |
|        | mmu-mir-200c              |                         |                                            |                                       |
|        | mmu-mir-290               |                         |                                            |                                       |
| 6      | mmu-mir-291               | 3                       | 1                                          | 0                                     |
|        | mmu-mir-292               |                         |                                            |                                       |

|    |                |   |   |   |
|----|----------------|---|---|---|
|    | mmu-mir-293    |   |   |   |
|    | mmu-mir-295    |   |   |   |
|    | mmu-mir-330    |   |   |   |
|    | mmu-mir-150    |   |   |   |
|    | mmu-mir-344    |   |   |   |
|    | mmu-mir-211    |   |   |   |
| 7  | mmu-mir-7-2    | 3 | 2 | 0 |
|    | mmu-mir-9-3    |   |   |   |
|    | mmu-mir-326    |   |   |   |
|    | mmu-mir-181c   |   |   |   |
|    | mmu-mir-23a    |   |   |   |
|    | mmu-mir-27a    |   |   |   |
|    | mmu-mir-24-2   |   |   |   |
|    | mmu-mir-328    |   |   |   |
| 8  | mmu-mir-140    | 3 | 2 | 0 |
|    | mmu-mir-10a-2  |   |   |   |
|    | mmu-mir-100    |   |   |   |
|    | mmu-let-7a-2   |   |   |   |
|    | mmu-mir-125b-1 |   |   |   |
|    | mmu-mir-34c    |   |   |   |
|    | mmu-mir-34b    |   |   |   |
|    | mmu-mir-190    |   |   |   |
| 9  | mmu-mir-184    | 3 | 2 | 0 |
|    | mmu-let-7g     |   |   |   |
|    | mmu-mir-191    |   |   |   |
|    | mmu-mir-26a-1  |   |   |   |
|    | mmu-mir-331    |   |   |   |
|    | mmu-let-7i     |   |   |   |
|    | mmu-mir-26a-2  |   |   |   |
|    | mmu-mir-216    |   |   |   |
| 10 | mmu-mir-217    | 3 | 1 | 0 |
|    | mmu-mir-103-1  |   |   |   |
|    | mmu-mir-340    |   |   |   |
|    | mmu-mir-324    |   |   |   |
|    | mmu-mir-195    |   |   |   |
|    | mmu-mir-132    |   |   |   |
|    | mmu-mir-22     |   |   |   |
|    | mmu-mir-144    |   |   |   |
| 11 | mmu-mir-193    | 3 | 1 | 0 |
|    | mmu-mir-301    |   |   |   |
|    | mmu-mir-142    |   |   |   |
|    | mmu-mir-10a-2  |   |   |   |
|    | mmu-mir-338    |   |   |   |
|    | mmu-mir-342    |   |   |   |
|    | mmu-mir-345    |   |   |   |
|    | mmu-mir-337    |   |   |   |
| 12 | mmu-mir-136    | 3 | 0 | 0 |

mmu-mir-329  
hsa-mir-200b  
hsa-mir-200a  
hsa-mir-30c-1  
hsa-mir-197  
hsa-mir-214  
hsa-mir-199a-2

---

<sup>a</sup> 8 individual MSCV constructs, each overexpressing a specific miRNA, were pooled at equal DNA concentration. The pooled DNA was used to produce virus to infect *Em-myc/+* fetal liver cells for adoptive transfer.

---

<sup>b</sup> Recipient animals were monitored for at least 6 months for tumor growth. For those that developed lymphomas, tumor cells were prepared from the enlarged lymph nodes, and then subjected to FACS analysis for GFP expression. The GFP expression is an indication that the tumors are derived from transduced *Em-myc/+* fetal liver cells.
